# Supplementary material
Source: Springer Nature journal article supplement (https://www.springermedizin.de/resource/supplementary/12958_2009_636_MOESM1_ESM.pdf/9568358)

# Cluster A

# Cluster B

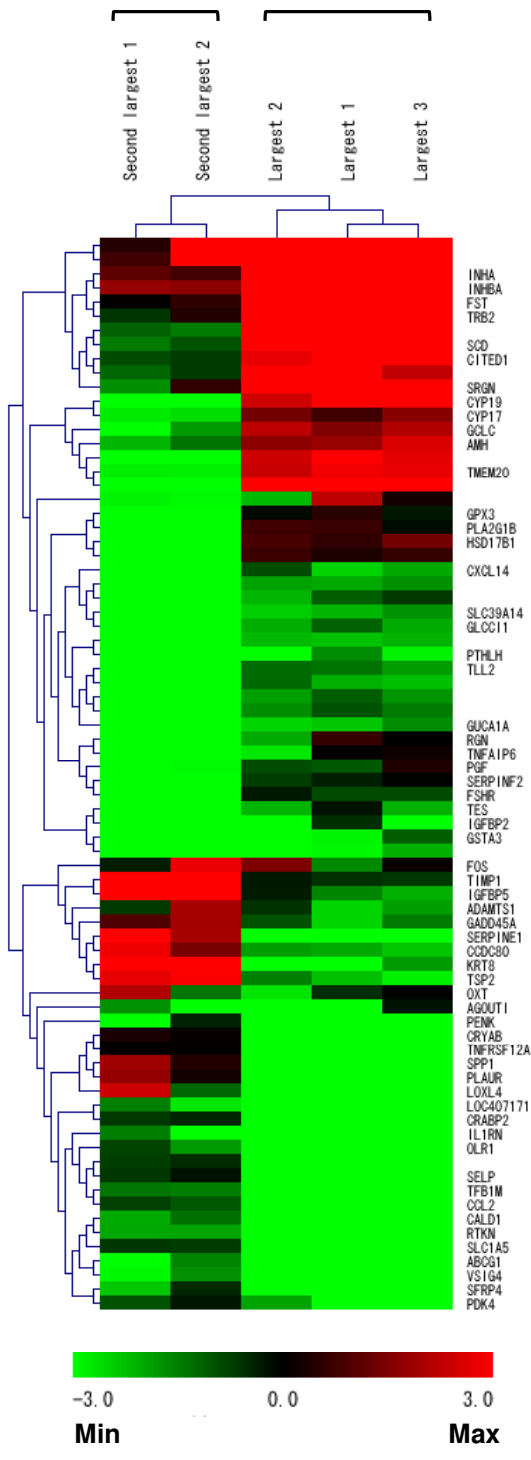

-3.0

0.0

3.0

Min

Max

Supplement: MOESM1 [file 9568358]
